# Supplementary material for: Widespread Protein Aggregation as an Inherent Part of Aging in C. elegans
Source: PubMed Central journal article supplement (PMC2919420; doi:10.1371/journal.pbio.1000450), 2010-08-10

Figure S4

A

BDU process in KIN-19::tagRFP animal, day 15 (immobile)

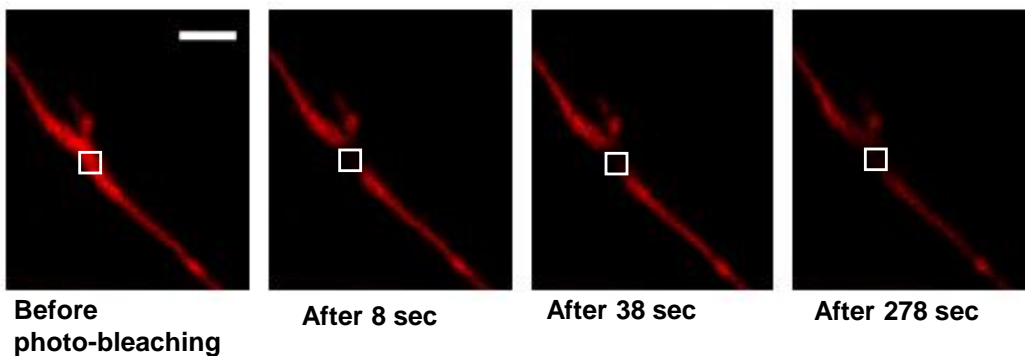

B

BDU process in KIN-19::tagRFP animal, day 3 (mobile)

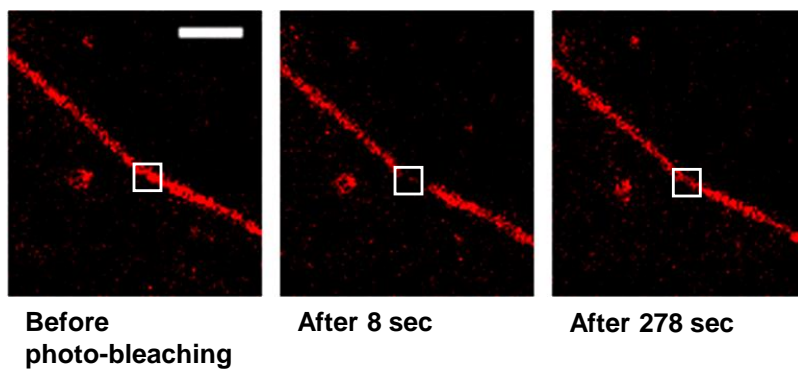

C

KIN-19::tagRFP expressing animals with *kin-19* RNAi, day 6

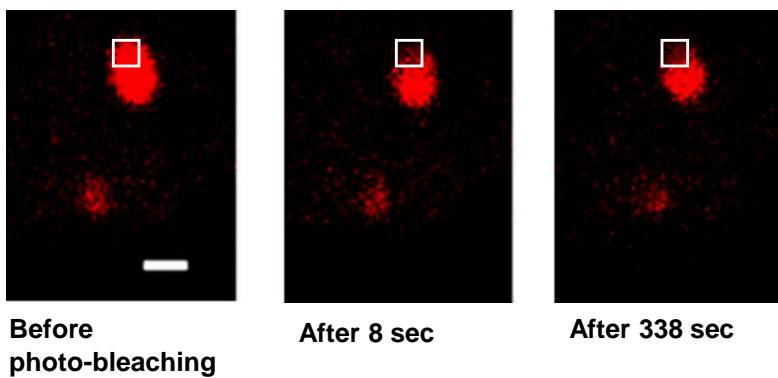

Supplement: pbio.1000450.s004.pdf [file pbio.1000450.s004.pdf]
