# Supplementary material for: Widespread Protein Aggregation as an Inherent Part of Aging in C. elegans
Source: PubMed Central journal article supplement (PMC2919420; doi:10.1371/journal.pbio.1000450), 2010-08-10

Figure S7

■ Aggregation-prone protein set  
■ Proteome

A

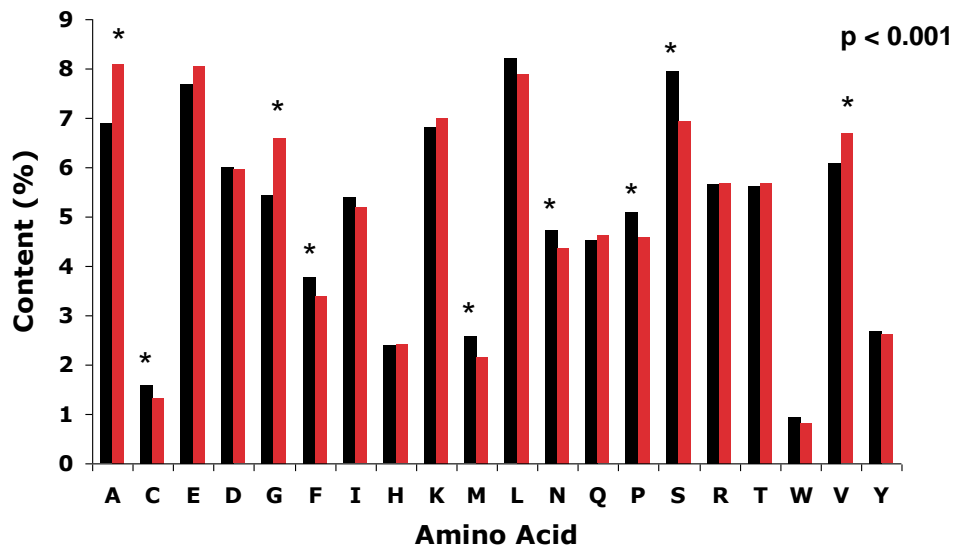

B

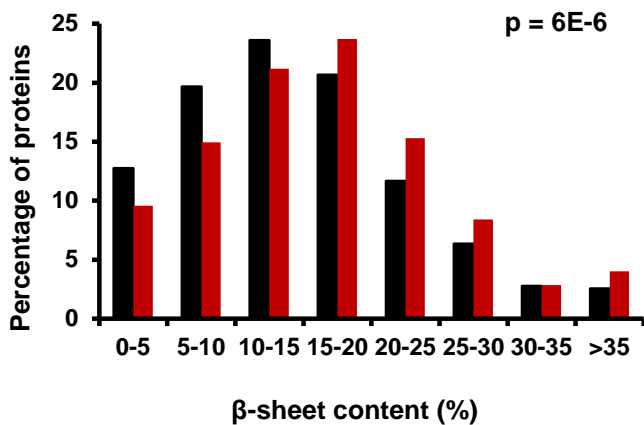

C

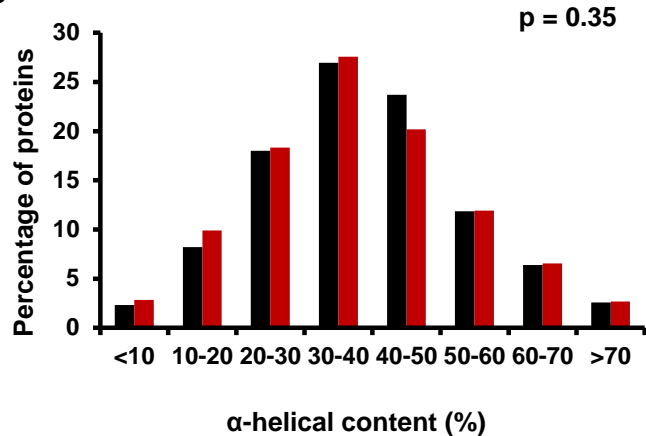

D

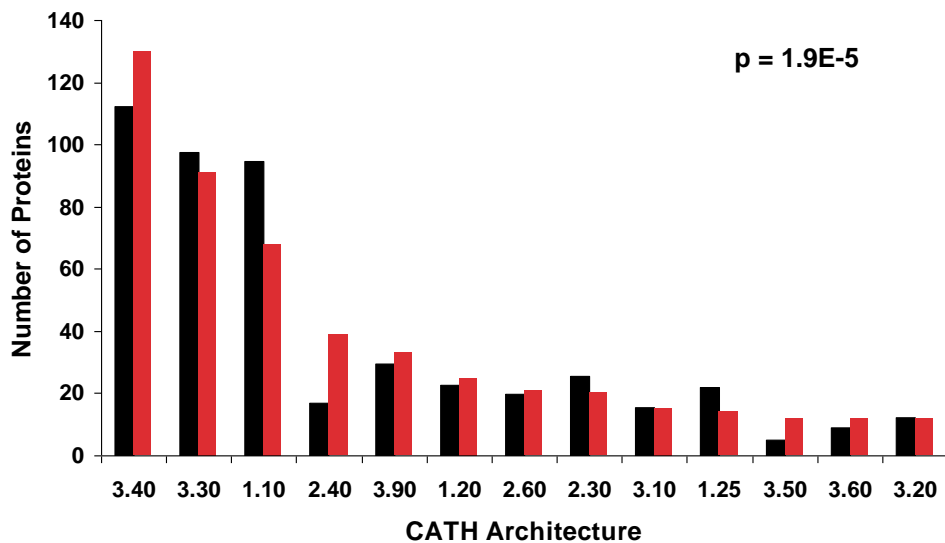

Supplement: pbio.1000450.s007.pdf [file pbio.1000450.s007.pdf]
