# Supplementary material for: Widespread Protein Aggregation as an Inherent Part of Aging in C. elegans
Source: PubMed Central journal article supplement (PMC2919420; doi:10.1371/journal.pbio.1000450), 2010-08-10
Supplement: pbio.1000450.s012.pdf [file pbio.1000450.s012.pdf]

**Table S4: Paralysis of *C. elegans* expressing muscle polyglutamine Q35 with or without muscle KIN-19**

| Experiment | Strain              | Day 6                 |             |         | Day 7                 |             |         | Day 8                 |             |         |
|------------|---------------------|-----------------------|-------------|---------|-----------------------|-------------|---------|-----------------------|-------------|---------|
|            |                     | Number of animals (n) | % paralyzed | P-value | Number of animals (n) | % paralyzed | P-value | Number of animals (n) | % paralyzed | P-value |
| 1          | KIN-19-tagRFP + Q35 | 129                   | 41.9        | 0.0003  | 123                   | 55.3        | 0.005   | 104                   | 72.1        | 0.19    |
|            | tagRFP + Q35        | 106                   | 18.9        |         | 96                    | 35.4        |         | 90                    | 62.2        |         |
| 2*         | KIN-19-tagRFP + Q35 | 66                    | 68.2        | <0.0001 | 65                    | 76.9        | <0.0001 | 55                    | 85.5        | 0.001   |
|            | tagRFP + Q35        | 76                    | 25.0        |         | 73                    | 31.5        |         | 69                    | 56.5        |         |
| 3          | KIN-19-tagRFP + Q35 | 120                   | 35.8        | 0.001   | 104                   | 72.1        | 0.004   | 87                    | 73.6        | 0.55    |
|            | tagRFP + Q35        | 94                    | 14.9        |         | 76                    | 50.0        |         | 71                    | 78.9        |         |
| 4#         | KIN-19-tagRFP + Q35 | 104                   | 51.9        | 0.108   |                       |             |         |                       |             |         |
|            | tagRFP + Q35        | 61                    | 37.7        |         |                       |             |         |                       |             |         |
| 5#         | KIN-19-tagRFP + Q35 | 98                    | 33.7        | 0.9187  |                       |             |         |                       |             |         |
|            | tagRFP + Q35        | 94                    | 33.0        |         |                       |             |         |                       |             |         |
| 6          | KIN-19-tagRFP + Q35 | 143                   | 18.9        | <0.0001 | 134                   | 55.2        | <0.0001 | 130                   | 87.7        | 0.13    |
|            | tagRFP + Q35        | 123                   | 1.6         |         | 113                   | 21.2        |         | 107                   | 63.6        |         |
|            | Q35 alone           | 142                   | 0.7         |         | 129                   | 27.1        |         | 122                   | 82.8        |         |

The assay was done in a blind fashion in which the identity of the samples was concealed.

(\*): Animals were maintained at 15°C until L4 stage and then transferred to 20°C. All other experiments were continuously kept at 20°C.

(#): Between the times we performed experiments 3 and 6, we carried out two experiments that showed no difference in paralysis between the experimental and control animals. We noted that the paralysis in the control animals was higher than average, which could explain why we saw no difference. However it remains unclear which experimental variable could account for these results. Furthermore, variability in the phenotype of polyglutamine-repeat transgenics has been previously reported (T. Gidalevitz, A. Ben-Zvi, K. H. Ho, H. R. Brignull, R. I. Morimoto, *Science* **311**, 1471-4 (Mar 10, 2006)).
