# Supplementary material for: Widespread Protein Aggregation as an Inherent Part of Aging in C. elegans
Source: PubMed Central journal article supplement (PMC2919420; doi:10.1371/journal.pbio.1000450), 2010-08-10
Supplement: pbio.1000450.s013.pdf [file pbio.1000450.s013.pdf]

**Table S5A: Specific functional categories are over-represented in the age-dependent insoluble protein set.**

| Gene ontology term               | Number of proteins | % of total | PValue  |
|----------------------------------|--------------------|------------|---------|
| Embryonic development            | 248                | 55%        | 5.2E-30 |
| Translation                      | 69                 | 15%        | 4.1E-27 |
| Growth                           | 154                | 34%        | 1.8E-17 |
| Protein folding                  | 19                 | 4%         | 3.9E-07 |
| Determination of adult life span | 35                 | 8%         | 4.4E-07 |
| tRNA aminoacylation              | 14                 | 3%         | 2.8E-06 |
| Cytoskeleton organization        | 23                 | 5%         | 3.8E-04 |

Functional annotation was carried out using the DAVID software. A total of 450 out of 461 age-dependent insoluble proteins were recognized by DAVID and 349 of these fell into one or more significant gene ontology biological process category. EASE score P-Value: modified Fisher Exact P-Value.

**Table S5B: Specific functional categories are over-represented in the age-independent insoluble protein set.**

| Gene ontology term               | Number of proteins | % of total | PValue  |
|----------------------------------|--------------------|------------|---------|
| Embryonic development            | 138                | 57%        | 2.4E-24 |
| Translation                      | 33                 | 14%        | 2E-10   |
| Cellular respiration             | 14                 | 6%         | 2.4E-10 |
| Growth                           | 81                 | 33%        | 2.2E-7  |
| Cofactor metabolic process       | 16                 | 7%         | 7.8E-5  |
| Determination of adult life span | 19                 | 8%         | 7.6E-4  |

Functional annotation was carried out using the DAVID software. A total of 243 out of 250 age-independent insoluble proteins were recognized by DAVID and 214 of these fell into one or more significant gene ontology biological process category. EASE score P-Value: modified Fisher Exact P-Value.
