# Supplementary material for: Widespread Protein Aggregation as an Inherent Part of Aging in C. elegans
Source: PLoS Biol. 2010 Aug 10;8(8):e1000450. doi: 10.1371/journal.pbio.1000450 (PMC2919420; doi:10.1371/journal.pbio.1000450)
Supplement: Table S6 — Proteins identified as aggregation-prone and identified in RNAi screens for extended lifespan. 27 out of 29 genes identified in Hansen et al. (2005) [59] and 56 out of 64 genes identified in Curran et al. (2007) [58] were present in our compiled mass spectrometry proteome. Grey highlight marks proteins found in the age-dependent insoluble set. (0.08 MB XLS) [file pbio.1000450.s014.xls]

## Sheet: Sheet1
Table S6: Proteins identified as aggregation-prone and identified in RNAi screens for extended lifespan.
Study	Uniprot ID	Gene WB ID	Gene name	Sequence name	protein name
Hansen et al., 2005	Q17763	WBGene00007385	atp-5	C06H2.1	Protein C06H2.1
Hansen et al., 2005	O17680	WBGene00008205	sams-1	C49F5.1	Probable S-adenosylmethionine synthetase 1
Hansen et al., 2005	Q19058	WBGene00017123	maoc-1	E04F6.3	Mao-c-like dehydratase domain protein 1
Hansen et al., 2005	Q19126	WBGene00000207	asb-2	F02E8.1	Atp synthase b homolog protein 2
Hansen et al., 2005	P91283	WBGene00000230	atp-3	F27C1.7	ATP synthase
Hansen et al., 2005	Q21233	WBGene00019401	nuo-4	K04G7.4	Putative uncharacterized protein
Hansen et al., 2005	O01602	WBGene00020417	nuo-2	T10E9.7	Putative uncharacterized protein
Hansen et al., 2005	O16785	WBGene00003932	pat-6	T21D12.4	Paralyzed arrest at two-fold protein 6
Hansen et al., 2005	Q9N4Y8	WBGene00021562	nuo-5	Y45G12B.1	NADH-ubiquinone oxidoreductase 75 kDa subunit
Curran et al., 2007	P91015	WBGene00001333	erm-1	C01G8.5	ERM-1A
Curran et al., 2007	P48152	WBGene00004472	rps-3	C23G10.3	40S ribosomal protein S3
Curran et al., 2007	P34339	WBGene00001209	egl-45	C27D11.1	Eukaryotic translation initiation factor 3 subunit A
Curran et al., 2007	P46561	WBGene00000229	atp-2	C34E10.6	ATP synthase subunit beta, mitochondrial
Curran et al., 2007	P46550	WBGene00000381	cct-6	F01F1.8	T-complex protein 1 subunit zeta
Curran et al., 2007	P91283	WBGene00000230	atp-3	F27C1.7	ATP synthase
Curran et al., 2007	Q20206	WBGene00004480	rps-11	F40F11.1	Protein F40F11.1
Curran et al., 2007	Q22037	WBGene00001999	hrp-1	F42A6.7	Heterogeneous nuclear ribonucleoprotein A1
Curran et al., 2007	P48156	WBGene00004477	rps-8	F42C5.8	40S ribosomal protein S8
Curran et al., 2007	P27639	WBGene00002083	inf-1	F57B9.6	Eukaryotic initiation factor 4A
Curran et al., 2007	Q9XXK1	WBGene00010419	H28O16.1	H28O16.1	ATP synthase subunit alpha, mitochondrial
Curran et al., 2007	P47208	WBGene00000379	cct-4	K01C8.10	T-complex protein 1 subunit delta
Curran et al., 2007	Q21482	WBGene00001572	gei-15	M03A8.4	Putative uncharacterized protein
Curran et al., 2007	B5BM23	WBGene00002066	ifg-1	M110.4	Protein M110.4c
Curran et al., 2007	Q9XXI9	WBGene00003154	mcm-2	Y17G7B.5	Protein Y17G7B.5a
Curran et al., 2007	Q9XWI6	WBGene00001225	eif-3.B	Y54E2A.11	Eukaryotic translation initiation factor 3 subunit B
Curran et al., 2007	Q86S66	WBGene00022042	Y65B4BR.5	Y65B4BR.5	Nascent polypeptide-associated complex subunit alpha
Curran et al., 2007	Q19626	WBGene00006921	vha-12	F20B6.2	Probable V-type proton ATPase subunit B
Note: 27 out of 29 genes identified in Hansen et al. (2005) and 56 out of 64 genes identified in Curran et al. (2007) were present
in our compiled mass spectrometry proteome.
Grey highlight marks proteins found in the age-dependent insoluble set.
