# Supplementary material for: Widespread Protein Aggregation as an Inherent Part of Aging in C. elegans
Source: PLoS Biol. 2010 Aug 10;8(8):e1000450. doi: 10.1371/journal.pbio.1000450 (PMC2919420; doi:10.1371/journal.pbio.1000450)
Supplement: Table S10 — Neurofibrillary tangle components identified as aggregation-prone in C. elegans . (#) Proteomic analysis of neurofibrillary tangles in Alzheimer disease identifies GAPDH as a detergent-insoluble paired helical filament tau binding protein (Wang, Q et al., Faseb J. 2005 May;19(7):869–71 [18]). Organism: human. (*) identified with BLAST (closest homolog with e-value<1-e05). Cumulative hypergeometric test p(X≥32)≈0. (0.03 MB XLS) [file pbio.1000450.s018.xls]

## Sheet: Sheet1
Table S10: Neurofibrillary tangle components identified as aggregation-prone in C. elegans
Proteins identified in		C. elegans
neurofibrillary tangles#	Human Uniprot ID	Uniprot ID homologs	C. elegans insoluble set
2',3'-cyclic nucleotide 3'-phosphodiesterase	B4DFN6
Actin, cytoplasmic 1	P60709	P10983	Yes
ADP, ATP carrier protein, liver isoform T2	P12236	O45865	Yes
Aldolase C, fructose-bisphosphate	P09972	P54216*
Alpha enolase	P06733	Q27527	Yes
Alpha-internexin	Q16352	P90901*	Yes
Alpha-synuclein	Q4W5L2
AnnexinA5	P08758	Q27473*
ATP synthase alpha chain	P25705	Q9XXK1	Yes
ATP synthase beta chain	P06576	P46561	Yes
ATP synthase oligomycin sensitivity conferral protein	P48047	Q7JNG1
Beta tubulin	Q13885	P41937
Beta-tubulin 4Q	Q3ZCM7	P12456*	Yes
Brain link protein-1 precursor	Q9GZV7
Calcium/calmodulin-dependent protein kinase type II alpha chain	A8K161	O62305
Carbonic anhydrase II	P00918	Q10462
Clathrin heavy chain 1	Q00610	P34574	Yes
Cofilin	P23528	Q07750	Yes
Creatine kinase, B chain	P12277	Q27535	Yes
Cytochrome c oxidase subunit IV isoform 1	P13073	Q9U329	Yes
Cytosolic malate dehydrogenase	P40925	Q9UAV5
Desmoglein 1 precursor	Q02413	Q19482*
Desmoplakin	P15924	Q86NF7*	Yes
Dihydropyrimidinase related protein-2	Q16555	Q18677
Dynamin-1	Q05193	P39055*	Yes
Elongation factor 1-alpha 1	Q6IQ15	P53013*	Yes
Ferritin light chain	P02792	Q9TYS3*
Fructose-bisphosphate aldolase A	P04075	P54216*
Galectin 7	P47929	Q9N384	Yes
Glucose 6-phosphate isomerase	P06744	Q7K707
Glyceraldehyde-3-phosphate dehydrogenase	P04406	P17329	Yes
Guanine nucleotide binding protein alpha oB,	Q6AWC5	P51875
Guanine nucleotide-binding protein beta subunit 4	Q9HAV0	P17343
H2A histone family, member A	P04908	Q27485
H4 histone family, member C	P62805	P62784	Yes
Heat shock cognate 71 kDa protein	P11142	P09446	Yes
Heterogeneous nuclear ribonucleoprotein K	P61978	P91277*	Yes
Hexokinase	B3KRA9	Q19440*
Hypothetical protein	P04350	P41937
Hypothetical protein KIAA0233	Q92508	O01260*
Lactate dehydrogenase B	P07195	Q27888
Malate dehydrogenase	P40926	O02640	Yes
Microtubule-associated protein RP/EB family member 3	Q9UPY8	Q9GRZ1
Microtubule-associated protein tau isoform 4	B3KTM0	O02592*
Mitogen-activated protein kinase 1	P28482	P39745
Myc box dependent interacting protein 1	O00499	Q21004*
Myelin basic protein	P02686
Peptidyl-prolyl cis-trans isomerase A	P62937	P52009*	Yes
Peroxiredoxin 2 isoform b	A6NIW5	Q8IG31*
Peroxiredoxin1	Q06830	A8DYR6	Yes
Peroxiredoxin6	P30041	Q8MXT1
Phosphoglycerate kinase 1	P00558	P91427	Yes
Pyruvate kinase 3 isoform 2	P14618	B7WNA0*	Yes
Septin 7	Q8TC62	Q9U334
SH3-containing GRB2-like protein 2	Q99962	B1V8A0
Similar to alpha-fetoprotein	P02768
Similar to neurofilament, light polypeptide 68kDa	P07196	P90901*	Yes
Sodium/potassium-transporting ATPase beta-1 chain	P05026	Q9XUY5*
Spectrin alpha chain, brain	B4DGT1	Q95ZL8*	Yes
Spectrin beta chain,brian1	Q01082	Q9U9J7*
Synapsin I	P17600	Q9N528*
Synapsin II	Q92777	Q8MXU3
Syntaxin binding protein 1	B7Z2V7	P34815
Tenascin-R	Q92752	Q9UB28	Yes
Tubulin alpha-4 chain	P68366	P91910	Yes
Tubulin beta-4 chain	Q13509	P12456*	Yes
Ubiquitin A-52 residue ribosomal protein fusion product 1	Q3MIH3	P14792*	Yes
Ubiquitin carboxyl-terminal hydrolase isozyme L1	P09936	Q9UAV3
Vacuolar ATP synthase catalytic subunit A	P38606	Q9XW92	Yes
Versican core protein precursor	Q86W61
Vimentin	P08670	P90901*	Yes
		Neurofibrillary tangle proteins with	Neurofibrillary proteins identified
		homologs in C.elegans	in the C. elegans insoluble set
	Total proteins	65	32
	Overlap		0.49
# Proteomic analysis of neurofibrillary tangles in Alzheimer disease identifies GAPDH as a detergent-insoluble paired helical filament tau binding protein
Wang, Q et al., Faseb J. 2005 May;19(7):869-71.
Organism: human
*identified with BLAST (closest homolog with e-value < 1-e05)
Cumulative hypergeometric test P(X ≥ 32) ≈ 0
