# Supplementary material for: Widespread Protein Aggregation as an Inherent Part of Aging in C. elegans
Source: PLoS Biol. 2010 Aug 10;8(8):e1000450. doi: 10.1371/journal.pbio.1000450 (PMC2919420; doi:10.1371/journal.pbio.1000450)
Supplement: Table S12 — Detergent-insoluble proteins identified in mouse model for ALS and in C. elegans . (#) Characterization of detergent-insoluble proteins in ALS indicates a causal link between nitrative stress and aggregation in pathogenesis (Basso M et al., PLoS One. 2009 Dec 2; 4(12):e8130 [93]). Organism: mouse. (*) identified with BLAST (closest homolog with e-value<1-e05). Cumulative hypergeometric test p(X≥22)≈0. (0.05 MB XLS) [file pbio.1000450.s020.xls]

## Sheet: Sheet1
Table S12: Detergent-insoluble proteins identified in mouse model for ALS and in C. elegans
	Mouse Uniprot ID	C. elegans
Detergent-insoluble proteins in ALS#		Uniprot ID homologs	C. elegans insoluble set
14-3-3 protein gamma	P61982	Q20655	Yes
Aconitase	Q99KI0	P34455	Yes
Alpha crystallin B chain	P23927	Q17849	Yes
Alpha enolase	P17182	Q27527	Yes
Annexin A5	P48036	Q27473*
Aspartate aminotransferase	P05202	Q17994	Yes
ATP synthase alpha chain	Q03265	Q9XXK1	Yes
Creatine kinase	Q04447	Q27535	Yes
Cytosolic malate dehydrogenase	P14152	Q9UAV5
Dihydropyrimidinase-related protein 2	O08553	Q18677
Endoplasmin	P08113	Q22235	Yes
ERK2	P63085	P39745
Fructose-bisphosphate aldolase C	P05063	P46563	Yes
Glial fibrillary acidic protein	P03995	O45168	Yes
Glutamate dehydrogenase 1	P26443	Q23621	Yes
Glutamine synthetase	P15105	Q9XVU2	Yes
Glyceraldehyde-3-phosphate dehydrogenase	P16858	P17329	Yes
Glycerol-3-phosphate dehydrogenase	P13707	A7LPE6	Yes
Heat shock cognate 70 kDa protein (HSC70)	P63017	P09446	Yes
Heat shock protein 90-alpha	P07901	Q18688	Yes
Heat-shock protein beta-1 (HSP27)	P14602	Q20660	Yes
Isocitrate dehydrogenase [NAD]	Q9D6R2	Q93714	Yes
L-lactate dehydrogenase B chain	P16125	Q27888
NADH-ubiquinone oxidoreductase	Q91VD9	Q9N4Y8	Yes
Neurofilament triplet M protein	P08553	Q19782	Yes
Peptidyl-prolyl cis-trans isomerase A (CypA)	P17742	P52015	Yes
Protein disulfide-isomerase (PDI)	P09103	Q17770	Yes
Pyruvate dehydrogenase E1	Q9D051	O44451	Yes
Pyruvate kinase isozyme M2	P52480	B7WNA0	Yes
Transitional endoplasmic reticulum ATPase	Q01853	P54812	Yes
Vimentin	P20152	Q86DC6	Yes
		Mouse insoluble proteins with	Mouse insoluble proteins identified
		homologs in C.elegans	in the C. elegans insoluble set
	Total proteins	31	26
	Overlap		0.84
# Characterization of detergent-insoluble proteins in ALS indicates a causal link between nitrative stress and aggregation in pathogenesis.
Basso M et al., PLoS One. 2009 Dec 2;4(12):e8130.
Organism: mouse
*identified with BLAST (closest homolog with e-value < 1-e05)
Cumulative hypergeometric test P(X ≥ 22) ≈ 0
